# Supplementary material for: Mutant p53-ENTPD5 control of the calnexin/calreticulin cycle: a druggable target for inhibiting integrin-α5-driven metastasis
Source: PubMed Central journal article supplement (PMC10413714; doi:10.1186/s13046-023-02785-z), 2023-08-10

**a** MDA-MB-231 (BRCA)  
p53 R280K

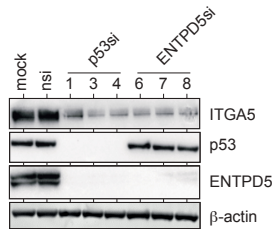

**b** PC-9 (NSCLC)  
p53 R248Q

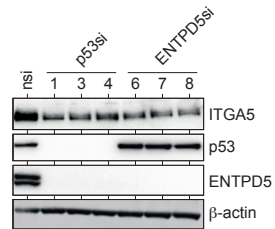

**c** H1975 (NSCLC)  
p53 R273H

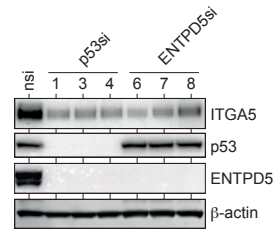

**d** OC58 (OVCA)  
p53 R175H

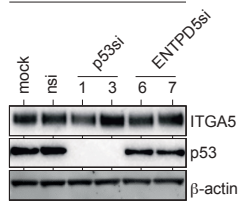

**e** OC121 (OVCA)  
p53 R175H

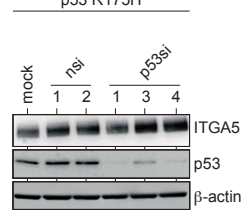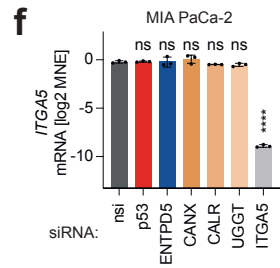

**g** H1975 (NSCLC)  
p53 R273H

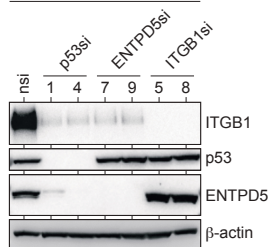

**h** MIA PaCa-2 (PDAC)  
p53 R248W

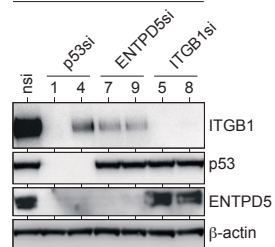

**i** MDA-MD-231 (BRCA)  
p53 R280K

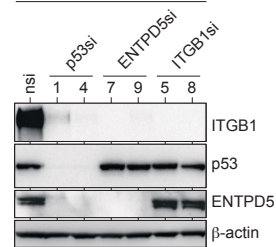

**j** OC58 (OVCA)  
p53 R175H

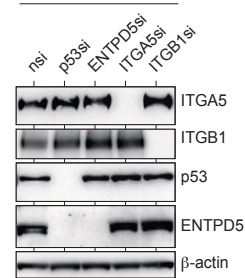

Supplement: 13046_2023_2785_MOESM1_ESM.pdf [file 13046_2023_2785_MOESM1_ESM.pdf]
