# Supplementary material for: Mutant p53-ENTPD5 control of the calnexin/calreticulin cycle: a druggable target for inhibiting integrin-α5-driven metastasis
Source: PubMed Central journal article supplement (PMC10413714; doi:10.1186/s13046-023-02785-z), 2023-08-10

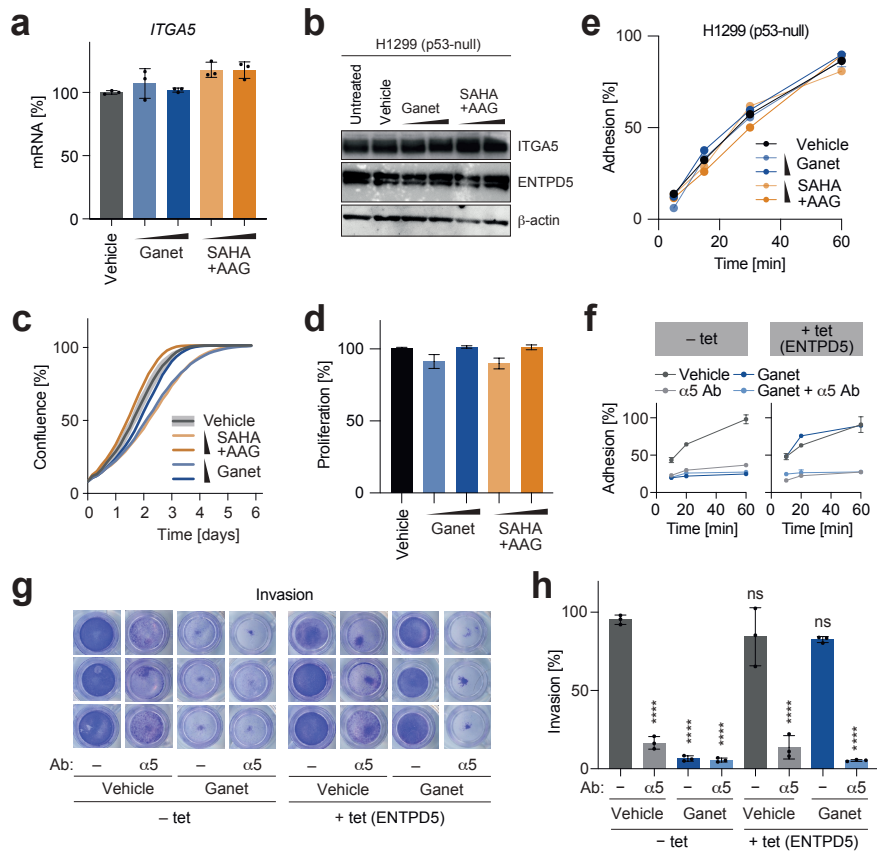

Supplement: 13046_2023_2785_MOESM7_ESM.pdf [file 13046_2023_2785_MOESM7_ESM.pdf]
